# Supplementary material for: On prioritising global health’s triple crisis of sepsis, COVID-19 and antimicrobial resistance: a mixed-methods study from Malawi
Source: BMC Health Serv Res. 2022 May 7;22:613. doi: 10.1186/s12913-022-08007-0 (PMC9076498; doi:10.1186/s12913-022-08007-0)
Supplement: Supplementary file 1 — Additional file 1. [file 12913_2022_8007_MOESM1_ESM.xlsx]

## Sheet: Sheet1
INTERVIEWEE ID		200711501	200711001	200711401	20071402	20071501	20071502	2007072101	200711301	200711801	200711601	200712401	20071901	200712301	200712201	200711101	200711201	20071301	20071401
Stakeholder group		Regulatory Body	Central Hospital	Central Hospital	Central Hospital	MoH	Central Hospital	Central Hospital	Regulatory Body	Research and Training Institution	Central Hospital	Regulatory Body	CSOs	Media	Media	Media	Research and Training Institution	Central Hospital	MoH
Age group		41+	21-30	21-30	31-40	41+	41+	41+	41+	41+	41+	21-30	31-40	31-40	31-40	41+	41+	31-40	31-40
Gender		Male	Female	Male	Female	Male	Male	Male	Female	Female	Female	Female	Male	Female	Female	Male	Male	Male	Male
Highest qualification		Masters Degree and MBBS	MMED and MBBS	MBBS	MBBS & Masters	MBBS & Masters	MBBS & Masters	MBBS & Masters	Masters Degree and BSc	Masters Degree and BSc	PhD	Bachelors Degree	Masters degree and BSc	Masters Degree	Bachelors Degree	Masters Degree and B.Ed	PhD in Public Health	Bachelors Degree	Masters Degree
Profession		Medical Doctor	Medical Doctor	Medical Doctor	Medical Doctor	Medical Doctor	Medical Doctor	Medical Doctor	Nurse-Midwife	Surgical Nurse	Nurse	Food Scientist	Public Health Specialist	Journalist	Journalist	Journalist	Social Scientist	Laboratory Technician	Economist
Health priorities Q1		Not sure	• Provision of adequate care • Diagnosis	• Covid-19 • HIV and AIDS	• Covid-19 • Sepsis • Maternal and child health • NCDs	• Health systems strengthening • Maternal and child health • HIV, TB and Malaria • Nutrition	• Health systems strengthening • Infrastructure	• Covid-19 • HIV, TB • Maternal and child health	• HIV • TB Malaria	• Communicable and non-communicable diseases • Promotion of a health population • Provision of essential health services to all Malawians, quality health services • Provision of resource in the health sector for quality health care • Resources Human resource	• Infection prevention • Antimicrobial stewardship • Surveillance	• Antimicrobial resistance • HIV and AIDS • Covid-19		• Covid-19 • Marternal and reproductive health • HIV and AIDS	• Covid-19 • Malaria • TB • HIV/AIDS	• Finances • Infrastructure • HIV and AIDS	• Maternal and child health • Chronic care • HIV and AIDS	• UTI • Sepsis • Health system strengthening • Infection prevention • Information	• Health systems strengthening • Finance • Infrastructure

## Sheet: Sheet2
		· Profession:
	· Stakeholder group (Please tick):	18	[ ] Medical Doctor	[ ] Researcher	[ ] Journalist	[ x ] Economist	[ ] Nurse	[ ] Public Health Specialist	[ ] Laboratory Technician
	[ ] Ministry of Health	2
	[ ] Regulatory Body	3
	[ ] Research/Training Institution	2
	[ x ] Central Hospital	7
	[ ] Civil society organisation (staff union)	1
	[ ] Media	3
	· Age group (Please tick):	18
	[ ] 26 – 30	3
	[ ] 31 – 40	6	1
	[ x ] 41 +	9	1
	· Gender:	18
	[ x ] Male	10
	[ ] Female	8
	· Highest qualification:	18
	[ ] Bachelors degree/ MBBS	4
	[ x ] Masters degree	12
	[ ] Doctorate	2
	· Profession:
	[ ] Medical Doctor
	[ ] Researcher
	[ ] Journalist
	[ x ] Economist
	[ ] Nurse
	[ ] Public Health Specialist
	[ ] Laboratory Technician
